# Supplementary material for: Gene-Expression Changes in Cerium Chloride-Induced Injury of Mouse Hippocampus
Source: PLOS journal article supplement (doi:10.1371/journal.pone.0060092), 2013-04-03
Supplement: S1 (10.1371/journal.pone.0060092.s001) [file journal.pone.0060092.s001]

**Table S1** Known genes which were altered significantly by intragastric administration of 2 mg/kg BW CeCl3 for consecutive 90 days. We classified the function of these genes according to gene Ontology in NCBI (<http://www.ncbi.nlm.nih.gov/>, GSE44906)

| ***symbol*** | ***Ontology*** | ***Gene ID*** | | ***P value*** | ***DiffScore*** | ***symbol*** | ***Ontology*** | ***Gene ID*** | ***P value*** | ***DiffScore*** |
| --- | --- | --- | --- | --- | --- | --- | --- | --- | --- | --- |
| **Learning and memory** | |  | |  |  |  |  |  |  |  |
| GNAQ | protein stabilization, forebrain neuron development | NM_008139 | | <0 .05 | 39.97 | BAI3 | neuropeptide signaling pathway | NM_175642 | <0 .05 | 13.84 |
| D130043K22RIK | neuron migration | NM_001081051 | | <0 .05 | 32.15 | NEGR1 | neuronal cell body | NM_001039094 | <0 .001 | 13.78 |
| Clasp2 | orbitofrontal cortex development | NM_001081960 | | <0 .05 | 29.99 | CHRD | central nervous system development | NM_009893 | <0 .05 | 13.71 |
| SRR | neuronal cell body | AK038074 | | <0 .05 | 29.64 | CSPG5 | regulation of synaptic transmission | NM_001166273 | <0 .05 | 13.30 |
| NRXN3 | neurotransmitter secretion | NM_172544 | | <0 .05 | 29.42 | Onecut2 | peripheral nervous system neuron development | NM_194268 | <0 .05 | 13.17 |
| LBCL1 | negative regulation of neurogenesis | NM_001198913 | | <0 .05 | 28.26 | SMPDL3B | sphingomyelin catabolic process | NM_133888 | <0 .05 | -13.97 |
| Nibpl | outflow tract morphogenesis | AK042158 | | <0 .05 | 26.54 | MT2 | nitric oxide mediated signal transduction | NM_008630 | <0 .001 | -13.99 |
| DCAMKL1 | axon extension | NM_001195539 | | <0 .05 | 23.33 | SLC5A7 | neurotransmitter biosynthetic process | NM_022025 | <0 .05 | -14.98 |
| Dlst | transferase activity | NM_030225 | | <0 .05 | 21.989 | RPGRIP1L | neural tube patterning | NM_173431 | <0 .05 | -15.02 |
| Gphn | synapse | NM_145965 | | <0 .05 | 19.95 | PRSS18 | regulation of neuron projection development | NM_001164697 | <0 .05 | -15.16 |
| Ntng2 | nervous system development | NM_133501 | | <0 .05 | 19.07 | MAL | membrane raft | NM_001171187 | <0 .001 | -15.35 |
| NDR3 | cytoplasm | NM_180956 | | <0 .05 | 18.68 | NKX6-2 | negative regulation of glial cell differentiation, central nervous system myelination | NM_183248 | <0 .05 | -15.56 |
| Arhgef15 | negative regulation of synapse maturation | NM_177566 | | <0 .05 | 18.51 | EGR2 | motor axon guidance | NM_010118 | <0 .0015 | -15.79 |
| UNC13B | Golgi apparatus | NM_021468 | | <0 .05 | 18.29 | ADCY8 | long-term memory | NM_009623 | <0 .05 | -16.62 |
| NRBP2 | nervous system development,negative regulation of neuron apoptosis | NM_144847 | | <0 .05 | 14.80 | FOS | nervous system development | NM_010234 | <0 .05 | -19.89 |
| NDRG2 | nervous system development | NM_001145959 | | <0 .05 | 14.33 | KLK6 | regulation of neuron projection development | NM_001164697 | <0 .05 | -21.64 |
| SNCB | negative regulation of neuron apoptosis | NM_033610 | | <0 .05 | 13.91 |  |  |  |  |  |
| **Immunization and inflammatory** | | | |  |  |  |  |  |  |  |
| S100A8 | extracellular space | | NM_013650 | <0 .05 | 95.11 | Nfat5 | cytokine production | NM_133957 | <0 .05 | 20.32 |
| SCGB1A1 | negative regulation of interleukin-13 production | | NM_011681 | <0 .05 | 74.04 | NKTR | peptidyl-prolyl cis-trans isomerase activity | AK169848 | <0 .001 | 16.31 |
| S100A9 | extracellular space | | NM_009114 | <0 .05 | 37.95 | TIA1 | nucleotide binding | NM_001164079 | <0 .001 | 15.46 |
| IGH-VJ558 | positive regulation of B cell proliferation | | AK131185 | <0 .05 | 35.20 | CFP | complement activation, alternative pathway | NM_008823 | <0 .05 | 15.09 |
| SUMO3 | protein sumoylation | | NM_019929 | <0 .05 | 27.55 | ISLR2 | membrane | NM_001161541 | <0 .05 | 13.26 |
| H2-K1 | antigen processing and presentation of peptide antigen via MHC class I | | NM_001001892 | <0 .05 | 26.07 | ADORA2B | receptor activity | NM_007413 | <0 .05 | -16.41 |
| IGK-C |  | | AK036494 | <0 .05 | 23.43 | FCRLS | receptor activity | NM_030707 | <0 .05 | -68.11 |
| Dock10 | guanyl-nucleotide exchange factor activity | | NM_175291 | <0 .05 | 22.54 |  |  |  |  |  |
| **Signal transduction** | | |  |  |  |  |  |  |  |  |
| Odz2 | signal transduction | | NM_011856 | <0 .05 | 28.63 | KCNJ16 | ion channel activity | NM_010604 | <0 .05 | 14.88 |
| Fyco1 | zinc ion binding | | NM_148925 | <0 .05 | 23.66 | KCNA3 | ion channel activity | NM_008418 | <0 .05 | 14.63 |
| FPR2 | cytoskeleton | | NM_172475 | <0 .05 | 20.35 | NKD2 | Wnt receptor signaling pathway | NM_028186 | <0 .05 | 14.33 |
| GPR153 | receptor activity | | NM_178406 | <0 .05 | 20.23 | NR1H3 | steroid hormone receptor activity | NM_001177730 | <0 .05 | 14.30 |
| LTF | hydrolase activity | | NM_008522 | <0 .05 | 19.27 | KCNQ5 | ion channel activity | AK039046 | <0 .001 | 14.14 |
| RGS11 | GTPase activator activity | | NM_001081069 | <0 .05 | 18.94 | PPP2R4 | calcium channel complex | NM_138748 | <0 .05 | 13.52 |
| KCNJ4 | ion channel activity | | NM_008427 | <0 .05 | 16.30 | NHP2L1 | single fertilization | NM_011482 | <0 .05 | -13.02 |
| Bcl9 | Wnt receptor signaling pathway | | AK133757 | <0 .05 | 16.14 | OLFR1216 | receptor activity | NM_146893 | <0 .05 | -13.26 |
| BZRAP1 | receptor activity | | NM_172449 | <0 .05 | 16.09 | CHMP5 | endosome to lysosome transport | NM_029814 | <0 .05 | -14.81 |
| PTH2 | receptor binding | | NM_053256 | <0 .05 | 14.96 |  |  |  |  |  |
| **Apoptosis** | | |  |  |  |  |  |  |  |  |
| AXUD1 | sequence-specific DNA binding transcription factor activity | | NM_153287 | <0 .05 | 72.68 | CDC37 | regulation of type I interferon-mediated signaling pathway | NM_016742 | <0 .05 | 28.98 |
| UBE2V1 | positive regulation of NF-kappaB transcription factor activity | | GH455465 | <0 .05 | 41.69 | TRB | sequence-specific DNA binding transcription factor activity | NM_019816 | <0 .05 | 28.24 |
| CDC37 | regulation of type I interferon-mediated signaling pathway | | NM_016742 | <0 .05 | 28.98 | LCN2 | transporter activity | NM_008491 | <0 .05 | 28.23 |
| **Response to stress** | | |  |  |  |  |  |  |  |  |
| ACAA1A | response to nutrient | | NM_130864 | <0 .05 | 24.72 | UQCRB | mitochondrial electron transport, ubiquinol to cytochrome c | NM_026219 | <0 .05 | 13.43 |
| CAMP | defense response to bacterium | | NM_009921 | <0 .05 | 21.70 | HSPE1 | response to stress | NM_008303 | <0 .05 | -13.66 |
| **Transcription** | | |  |  |  |  |  |  |  |  |
| Sfpq | transcription | | AK141302 | <0 .05 | 62.73 | Akap17b | spliceosomal complex | NM_001081956 | <0 .05 | 14.11 |
| RAPGEFL1 | exon-exon junction complex | | NM_025875 | <0 .05 | 38.34 | SPNR | double-stranded RNA binding | NM_009261 | <0 .05 | 13.30 |
| Cnot3 | transcription | | NM_146176 | <0 .05 | 26.99 | TFDP1 | sequence-specific DNA binding transcription factor activity | NM_009361 | <0 .05 | 13.24 |
| TRPS1 | sequence-specific DNA binding transcription factor activity | | BC049857 | <0 .05 | 25.14 | Foxk2 | sequence-specific DNA binding transcription factor activity | NM_001080932 | <0 .05 | 13.04 |
| Bclaf1 | transcription repressor activity | | NM_001025393 | <0 .05 | 19.24 | N6AMT2 | methyltransferase activity | NM_026526 | <0 .05 | -13.50 |
| PER3 | transcription | | NM_011067 | <0 .05 | 19.01 | TLL1 | collagen binding | BX524877 | <0 .05 | -15.50 |
| Rtl1 | multicellular organismal development | | NM_184109 | <0 .05 | 18.46 | SIRT7 | positive regulation of transcription on exit from mitosis | NM_153056 | <0 .05 | -17.09 |
| PRPF38B | spliceosomal complex | | NM_025845 | <0 .05 | 16.81 | MYST2 | sequence-specific DNA binding transcription factor activity | NM_001195003 | <0 .05 | -19.41 |
| ZNF24 | sequence-specific DNA binding transcription factor activity | | NM_021559 | <0 .05 | 15.41 | ZFP35 | transcription | NM_011755 | <0 .05 | -31.64 |
| Celf2 | RNA binding | | NM_001110230 | <0 .05 | 15.04 | RBM8A | nucleus | NM_001102407 | <0 .001 | -42.38 |
| FXR2 | RNA binding | | NM_011814 | <0 .05 | 14.39 | XIST | chromosome | L04961 | <0 .05 | -57.77 |
| ZFP162 | transcription | | NM_011750 | <0 .05 | 14.38 |  |  |  |  |  |
| **Cell structure and cytoskeleton** | | | |  |  |  |  |  |  |  |
| KRT1-12 | intermediate filament | NM_010661 | | <0 .05 | 42.70 | AI428936 | actin binding | NM_153577 | <0 .05 | 13.53 |
| Cttnbp2 | actin cytoskeleton | NM_080285 | | <0 .05 | 29.03 | Anp32e | cytoplasmic membrane-bounded vesicle | NM_023210 | <0 .05 | 13.52 |
| PCDHB20 | cell adhesion | NM_053145 | | <0 .05 | 21.02 | Tmem219 | cellular_component | NM_026827 | <0 .05 | 13.50 |
| ZNF512B | cellular_component | NM_001164597 | | <0 .05 | 15.86 | AI662250 | intermediate filament binding | NM_001166474 | 0<0 .05 | 13.22 |
| LMNB2 | nucleus | NM_010722 | | <0 .05 | 15.79 | PODXL | microvillus membrane | NM_013723 | <0 .05 | 13.10 |
| ELFN2 | cell surface | NM_183141 | | <0 .05 | 15.69 | MYH11 | stress fiber | NM_013607 | <0 .05 | -13.56 |
| MYOM3 | cellular_component | NM_001085509 | | <0 .05 | 15.52 | Arc | actin binding | NM_018790 | <0 .05 | -13.86 |
| SNTB2 | microtubule | NM_009229 | | <0 .001 | 15.29 | Agpat1 | 1-acylglycerol-3-phosphate O-acyltransferase activity | NM_001163379 | <0 .05 | -14.83 |
| MTMR4 | phosphatase activity | NM_133215 | | <0 .05 | 14.80 | CEP63 | cytoskeleton | NM_001081122 | <0 .05 | -17.67 |
| **Growth and development** | |  | |  |  |  |  |  |  |  |
| GTL2 | liver development | AK078613 | | <0 .05 | 45.81 | Mysm1 | chromatin remodeling complex | NM_177239 | <0 .05 | 15.14 |
| FUS | nucleus | NM_139149 | | <0 .05 | 22.30 | TNKS2 | NAD+ ADP-ribosyltransferase activity | NM_001163635 | <0 .05 | 14.77 |
| Calm2 | spindle pole | NM_007589 | | <0 .05 | 22.23 | EG434760 | cellular_component | NM_001081669 | <0 .05 | 14.75 |
| DNAJC7 | unfolded protein binding | NM_019795 | | <0 .05 | 20.96 | CCNT2 | nucleus | NM_028399 | <0 .001 | 14.56 |
| Itfg1 | cellular_component | NM_028007 | | <0 .05 | 18.36 | A730008H23RIK | nucleus | NM_172505 | <0 .05 | 13.86 |
| PLCD1 | phosphatidylinositol-4,5-bisphosphate binding | NM_019676 | | <0 .05 | 17.85 | PI16 | negative regulation of peptidase activity | NM_023734 | <0 .05 | -13.94 |
| SPRY4 | multicellular organismal development | NM_011898 | | <0 .05 | 16.42 | PRL2C3 | positive regulation of cell proliferation | NM_011118 | <0 .05 | -15.58 |
| Dgkg | transferase activity | AK085470 | | <0 .05 | 16.20 | PDK2 | transferase activity | NM_133667 | <0 .05 | -19.43 |
| 6430706D22RIK | CenH3-containing nucleosome assembly at centromere | NM_198652 | | <0 .05 | 15.91 | Myadml2 | cellular_component | NM_026751 | <0 .05 | -39.34 |
| **Metabolism** | |  | |  |  |  |  |  |  |  |
| Apoa2 | biological_process | NM_001166394 | | <0 .05 | 47.81 | SAT2 | spermine metabolic process | NM_026991 | <0 .05 | 13.92 |
| Dpp8 | proteolysis | AK009140 | | <0 .05 | 20.63 | GZMN | hydrolase activity | NM_153052 | <0 .05 | 13.48 |
| DOT1L | methyltransferase activity | AK164062 | | <0 .05 | 20.33 | CYP46A1 | heme binding | NM_010010 | <0 .05 | 13.04 |
| MAT1A | one-carbon metabolic process | NM_133653 | | <0 .05 | 20.01 | DUS1L | biological_process | NM_001166661 | <0 .05 | -13.73 |
| Ola1 | hydrolase activity | NM_030091 | | <0 .05 | 17.64 | GOT1L1 | transferase activity | NM_029674 | <0 .05 | -16.62 |
| GPLD1 | hydrolase activity | NM_008156 | | <0 .05 | 16.87 | NEU1 | hydrolase activity, acting on glycosyl bonds | NM_010893 | <0 .05 | -34.55 |
| Abhd14b | hydrolase activity | NM_029631 | | <0 .05 | 15.31 | RETSAT | nuclear membrane | NM_026159 | <0 .05 | -38.11 |
| A930035D04RIK | SCF-dependent proteasomal ubiquitin-dependent protein catabolic process | NM_012042 | | <0 .05 | 14.40 |  |  |  |  |  |
| **Translation** | |  | |  |  |  |  |  |  |  |
| EIF1B | translation initiation factor activity | NM_026892 | | <0 .05 | 56.21 | NARS2 | asparaginyl-tRNA aminoacylation | NM_153591 | <0 .05 | 15.26 |
| Eif2c2 | cellular_component | AK075904 | | <0 .05 | 17.62 |  |  |  |  |  |
